# Supplementary material for: Superconductivity across Lifshitz transition and anomalous insulating state in surface K–dosed (Li0.8Fe0.2OH)FeSe
Source: PubMed Central journal article supplement — Sci Adv. 2017 Jul 14;3(7):e1603238. doi: 10.1126/sciadv.1603238 (PMC5510993; doi:10.1126/sciadv.1603238), 2017-07-14
Supplement: 1603238_SM.pdf [file 1603238_SM.pdf]

## Supplementary Materials for Superconductivity across Lifshitz transition and anomalous insulating state in surface K-dosed $(\text{Li}_{0.8}\text{Fe}_{0.2}\text{OH})\text{FeSe}$

Mingqiang Ren, Yajun Yan, Xiaohai Niu, Ran Tao, Die Hu, Rui Peng, Binping Xie, Jun Zhao,  
Tong Zhang, Dong-Lai Feng

Published 14 July 2017, *Sci. Adv.* **3**, e1603238 (2017)  
DOI: 10.1126/sciadv.1603238

### This PDF file includes:

- fig. S1. Resistivity, dc magnetic susceptibility measurement, and optical microscopy image of  $(\text{Li}_{0.8}\text{Fe}_{0.2})\text{OHFeSe}$  single crystal.
- fig. S2. Topographic image and STS taken on the as-cleaved  $\text{Li}_{0.8}\text{Fe}_{0.2}\text{OH}$  surface.
- fig. S3. Spatial distribution of the superconducting gap on the as-cleaved FeSe surface.
- fig. S4. Additional topographic images of the FeSe surface after K dosing.
- fig. S5. Unnormalized  $dI/dV$  spectra at the  $K_c$  near Lifshitz transition.
- fig. S6.  $dI/dV$  maps and corresponding FFTs taken in an area of  $100 \times 100 \text{ nm}^2$  of the FeSe-terminated surface at  $K_c = 0.124 \text{ ML}$ .

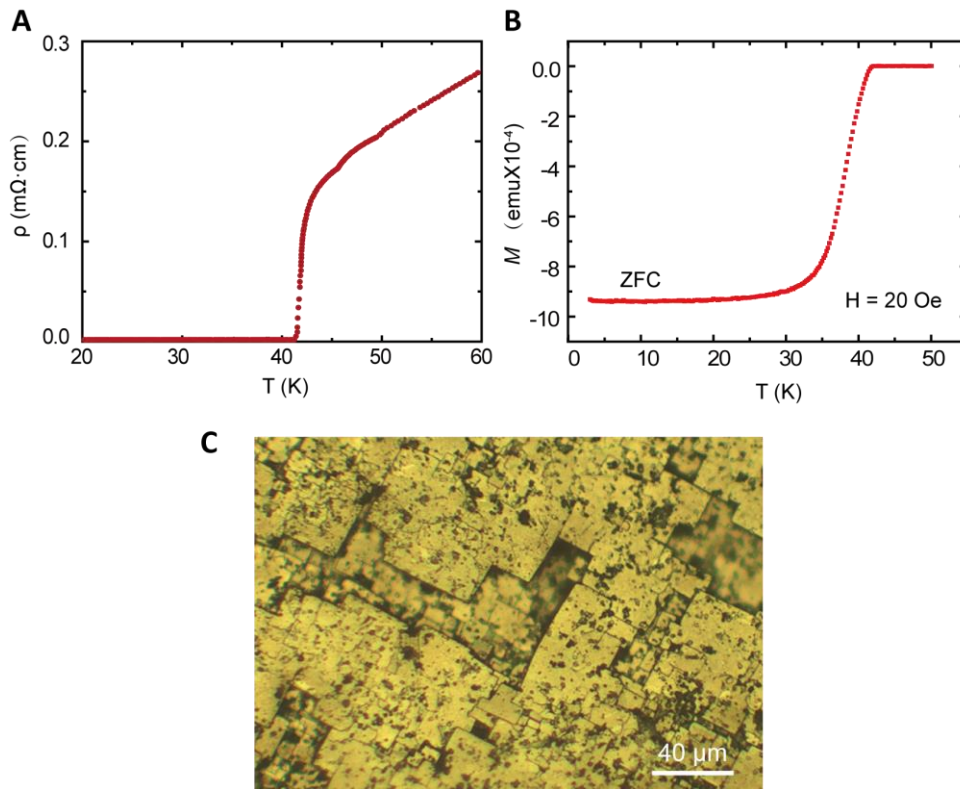

**fig. S1. Resistivity, dc magnetic susceptibility measurement, and optical microscopy image of  $(\text{Li}_{0.8}\text{Fe}_{0.2})\text{OHFeSe}$  single crystal.** (A) Temperature dependence of the resistivity of  $(\text{Li}_{0.8}\text{Fe}_{0.2})\text{OHFeSe}$  single crystal. (B) Temperature dependence of the DC magnetic susceptibility of  $(\text{Li}_{0.8}\text{Fe}_{0.2})\text{OHFeSe}$  measured with zero-field cooling (ZFC). (C) Optical microscopy image of a surface of  $(\text{Li}_{0.8}\text{Fe}_{0.2})\text{OHFeSe}$  single crystal.

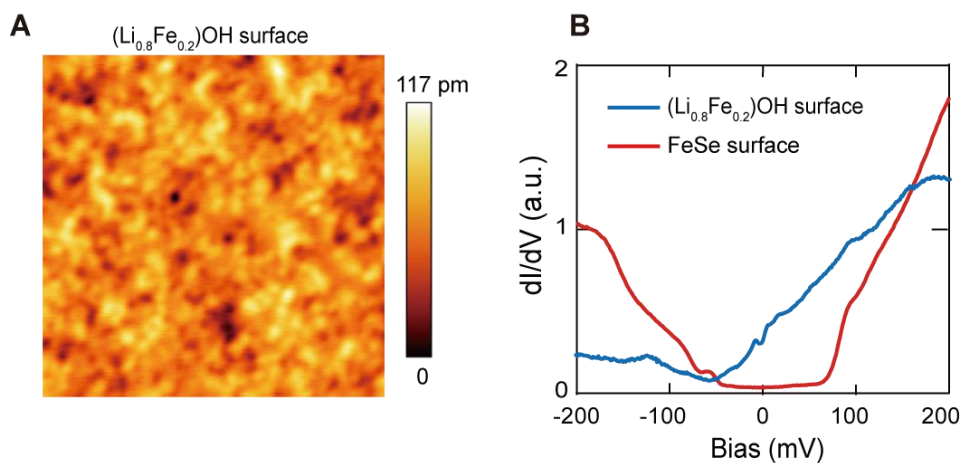

**fig. S2. Topographic image and STS taken on the as-cleaved  $\text{Li}_{0.8}\text{Fe}_{0.2}\text{OH}$  surface.** (A) Topographic image of as-cleaved  $\text{Li}_{0.8}\text{Fe}_{0.2}\text{OH}$  surface. (B)  $dI/dV$  spectra taken on  $\text{Li}_{0.8}\text{Fe}_{0.2}\text{OH}$  surface and FeSe surface, respectively.

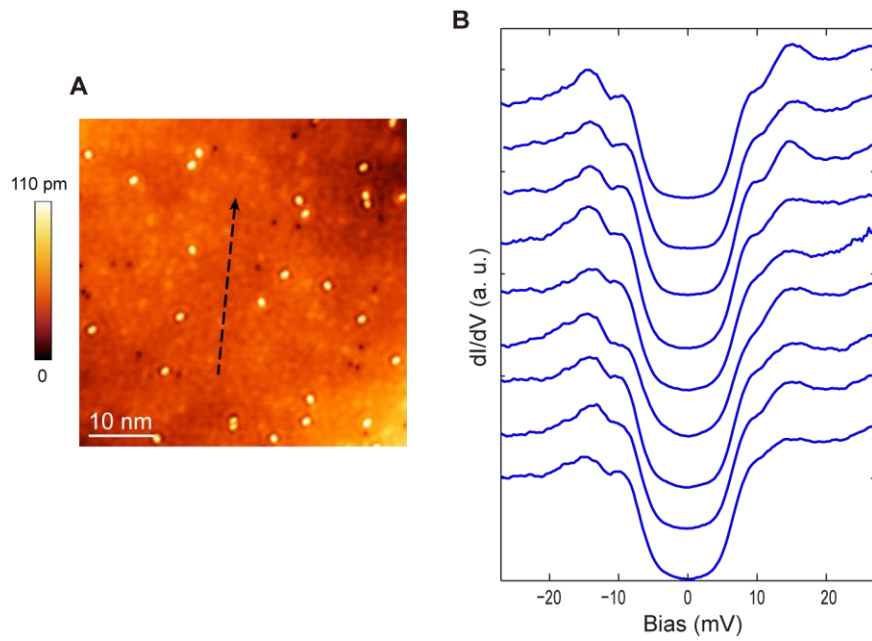

**fig. S3. Spatial distribution of the superconducting gap on the as-cleaved FeSe surface.** (A) Topography of FeSe surface (same as Fig. 1A). (B)  $dI/dV$  spectra taken along the line cut marked in (A) shows a spatially-homogenous superconducting gap.

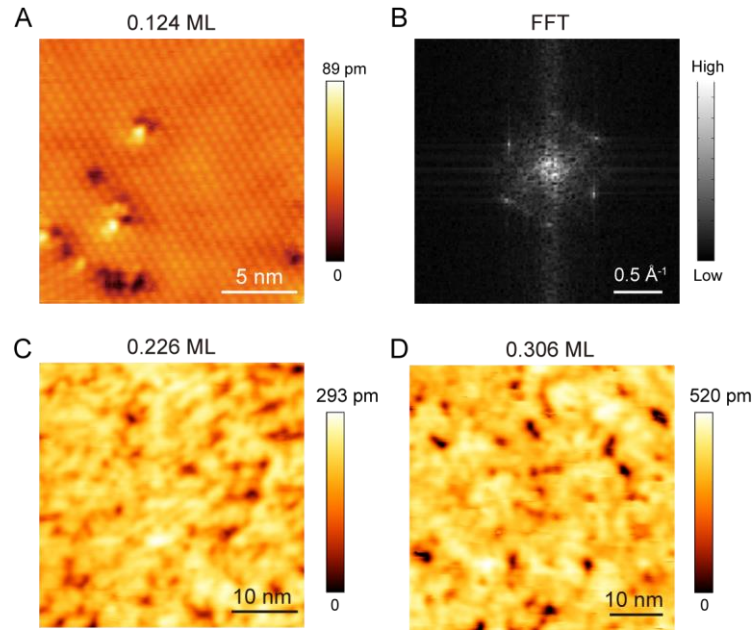

**fig. S4. Additional topographic images of the FeSe surface after K dosing. (A).**  $K_c=0.124$  ML, taken mostly in a single rotational domain. **(B)** FFT image of (A), showing six Bragg spots. (Note that due to the tip drift in scanning the Bragg spots are not perfectly six-folding symmetric). **(C)**  $K_c=0.226$  ML (size:  $40\times 40$  nm<sup>2</sup>), **(D)**  $K_c=0.306$  ML (size:  $50\times 50$  nm<sup>2</sup>)

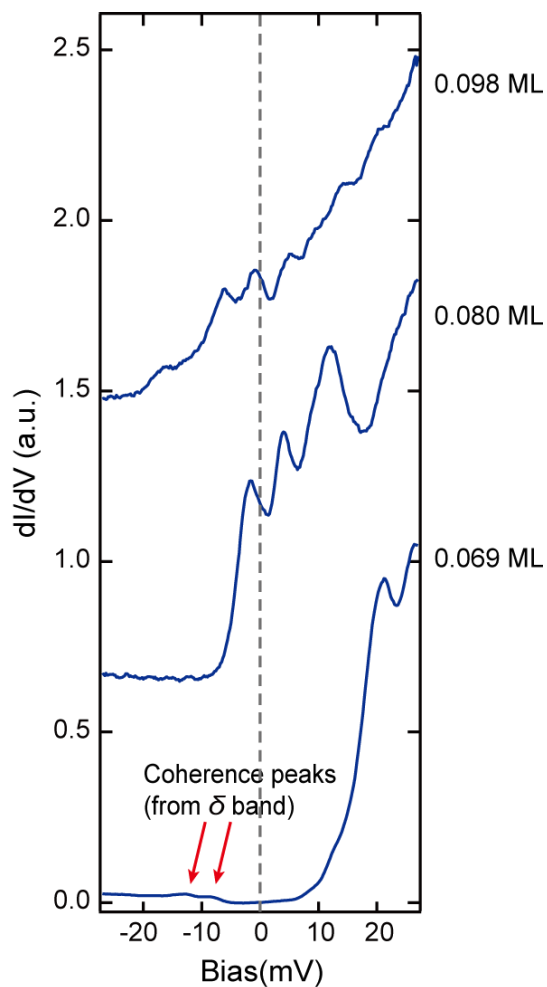

**fig. S5. Unnormalized  $dI/dV$  spectra at the  $K_c$  near Lifshitz transition.**

Un-normalized  $dI/dV$  spectra of  $K_c=0.069$  ML, 0.080ML and 0.098 ML, showing the evolution of the DOS near the Lifshitz transition. The red arrows indicate the double coherence peaks of the  $\delta$  band.

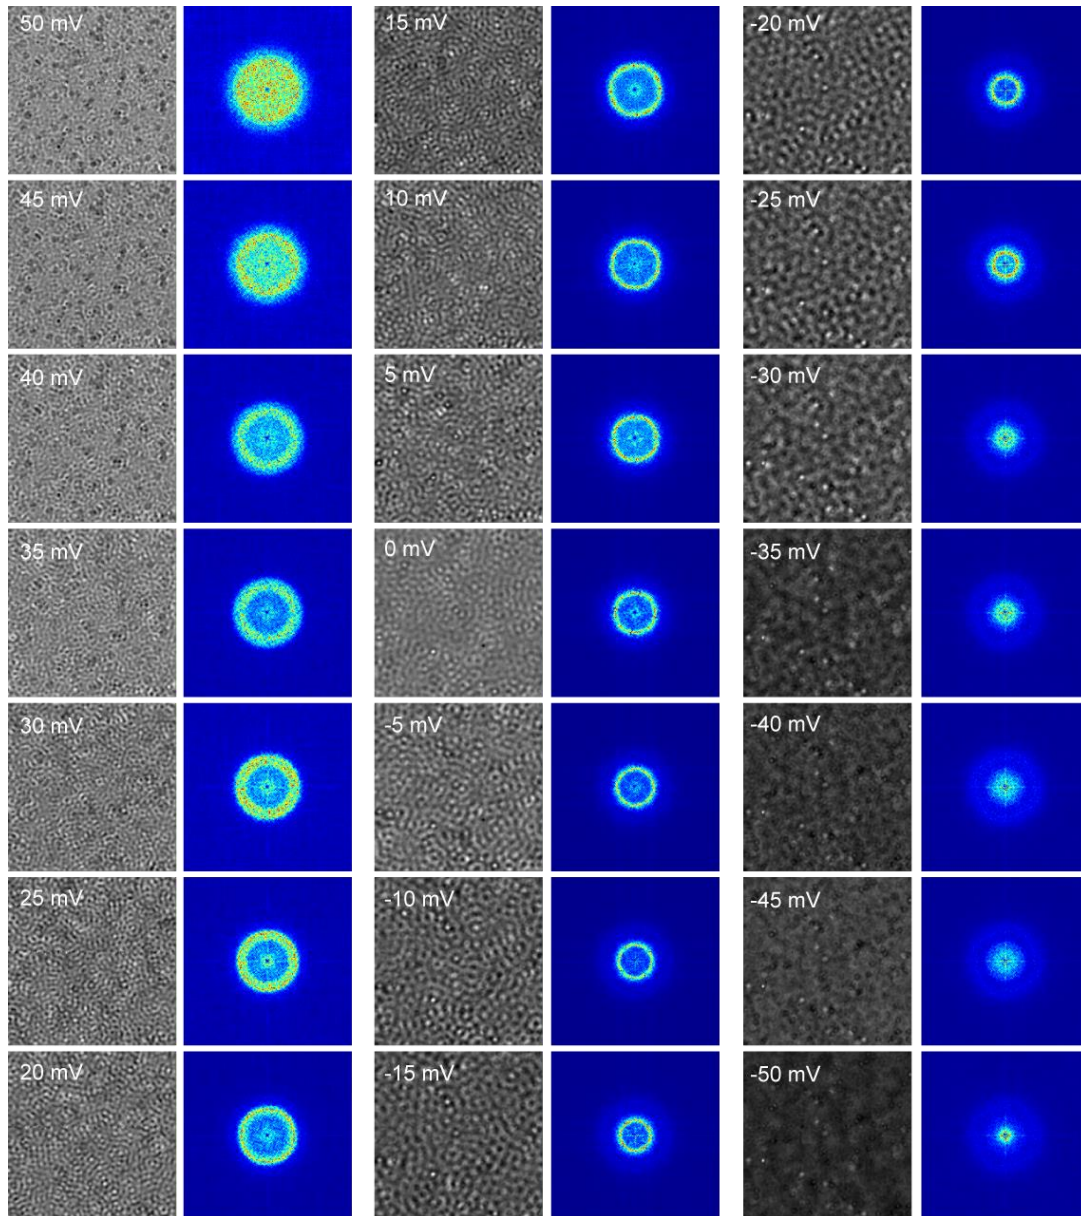

**fig. S6.  $dI/dV$  maps and corresponding FFTs taken in an area of  $100 \times 100 \text{ nm}^2$  of the FeSe-terminated surface at  $K_c = 0.124 \text{ ML}$ . Set point:  $V_b = 50 \text{ mV}$ ,  $I = 150 \text{ pA}$ ,  $\Delta V = 3 \text{ mV}$ . Each map has  $200 \times 200$  pixels. The FFT images are four-fold symmetrized.**
